# Supplementary material for: High electrochemical performance of nickel cobaltite@biomass carbon composite (NiCoO@BC) derived from the bark of Anacardium occidentale for supercapacitor application
Source: PubMed Central journal article supplement (PMC10865185; doi:10.1039/d3ra08138a), 2024-02-14
Supplement: RA-014-D3RA08138A-s001.pdf [file RA-014-D3RA08138A-s001.pdf]

## Electronic Supplementary Information (ESI)

### High electrochemical performance of the nickel cobaltite@biomass carbon composite (NiCoO@BC) derived from bark of *Anacardium Occidentale* for supercapacitor application

Modou Diop<sup>1,2</sup>, Baye Modou Ndiaye<sup>1,2</sup>, Sokhna Dieng<sup>2</sup>, Balla D. Ngom<sup>2\*</sup>, Mohamed Chaker<sup>1\*</sup>

<sup>1</sup> Institut National de la Recherche Scientifique (INRS), Centre – Énergie Matériaux Télécommunications (EMT)  
1650, Boul. Lionel Boulet, Varennes (Québec) J3X 1P7 Canada

<sup>2</sup> Laboratoire de Photonique Quantique, d'Énergie et de Nano-Fabrication (LPQEN), Faculté des Sciences et Techniques  
Université Cheikh Anta Diop de Dakar (UCAD) B.P. 5005 Dakar-Fann Dakar, Sénégal

\*Corresponding authors.

Email: [bdngom@gmail.com](mailto:bdngom@gmail.com)

Email: [mohamed.chaker@inrs.ca](mailto:mohamed.chaker@inrs.ca)

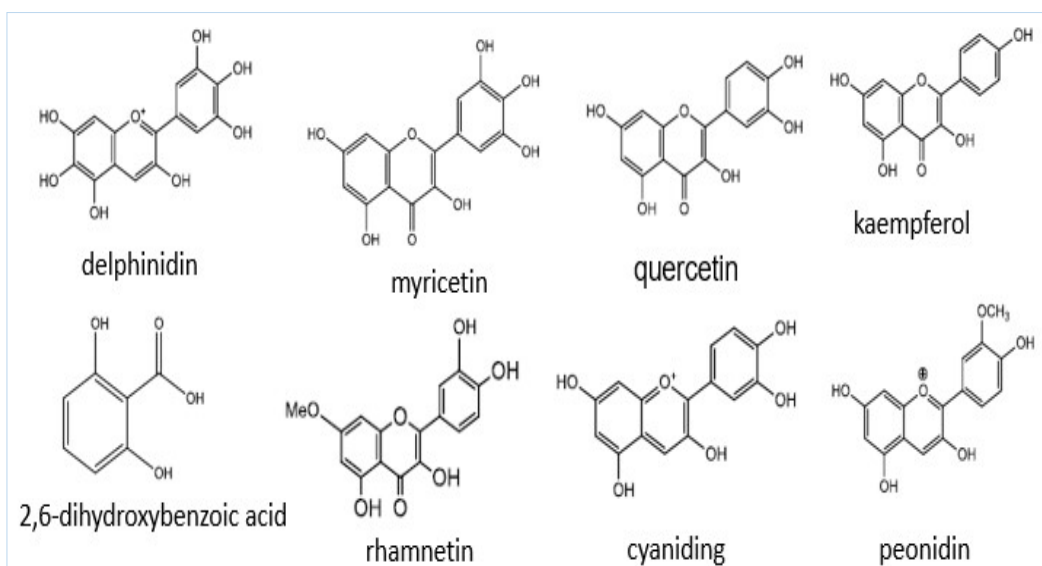

**Fig. S1:** Some of the chemical bioactive molecular compounds (phenolic acid) within the *Anacardium Occidentale* (AO).

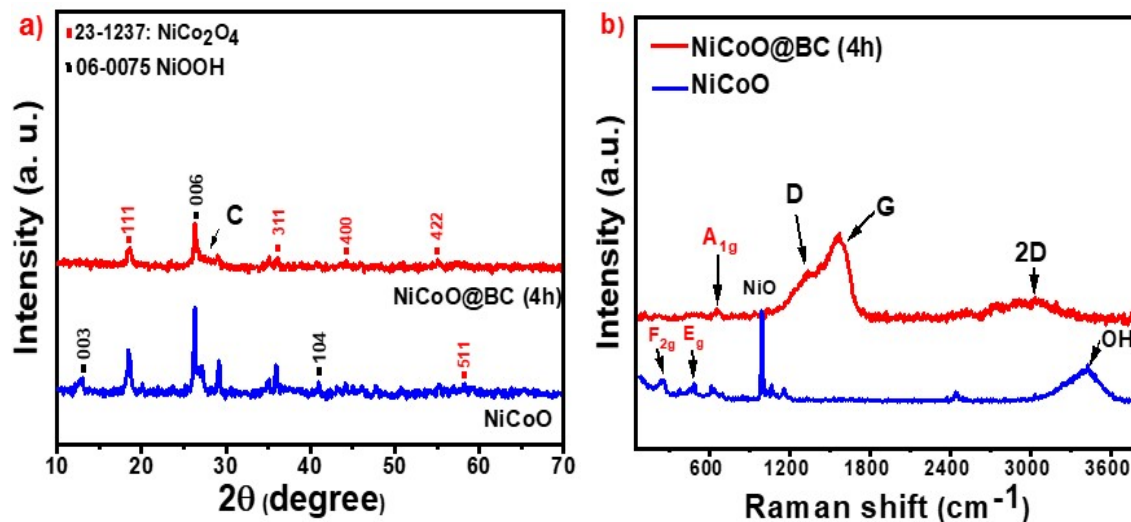

Fig. S2: XRD (a) and Raman spectra (b) of pristine NiCoO and NiCoO@BC (4h) composite.

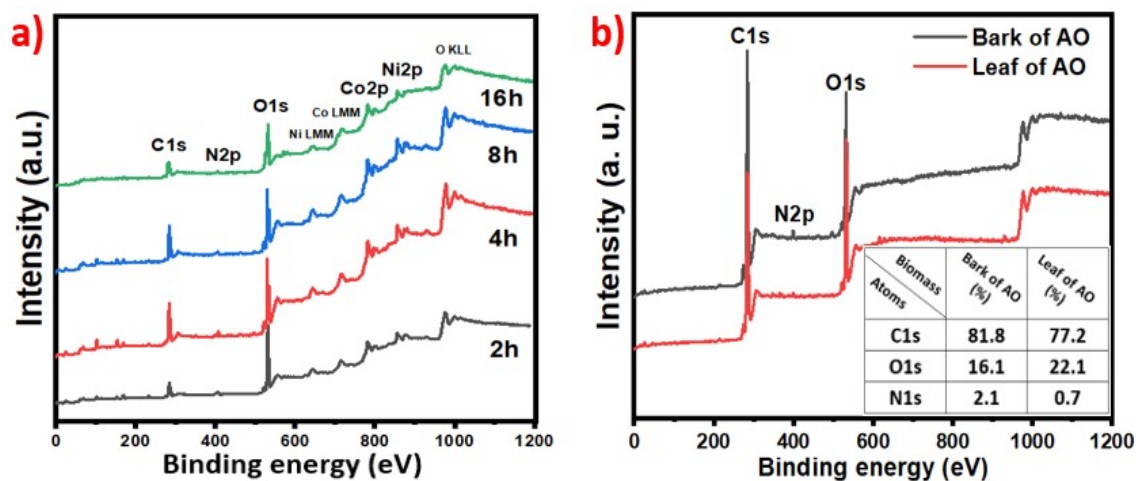

Fig. S3: a) XPS survey spectra of the NiCoO@BC composites at different synthesis time durations (2h, 4h, 8h, 16h) and b) of the leaf and the bark of AO.

Table S1: Chemical composition of the leaves and barks of AO in comparison with some parts of other biomass.

| Sample         | C (%) | H (%) | N (%) | O (%) | References                 |
|----------------|-------|-------|-------|-------|----------------------------|
| Raw Willow     | 49.5  | 6.1   | 0.2   | 44.4  | Raimie H.H. Ibrahim et al. |
| Raw eucalyptus | 49.3  | 6.5   | 0.0   | 44.3  |                            |
| Raw hardwood   | 46.8  | 5.9   | 0.1   | 47.2  |                            |
| Raw softwood   | 46.7  | 5.9   | 0.0   | 47.4  |                            |
| Bark of AO     | 81.8  | -     | 2,1   | 16,1  | This work                  |
| Leaf of AO     | 77,2  | -     | 0,7   | 22,1  |                            |

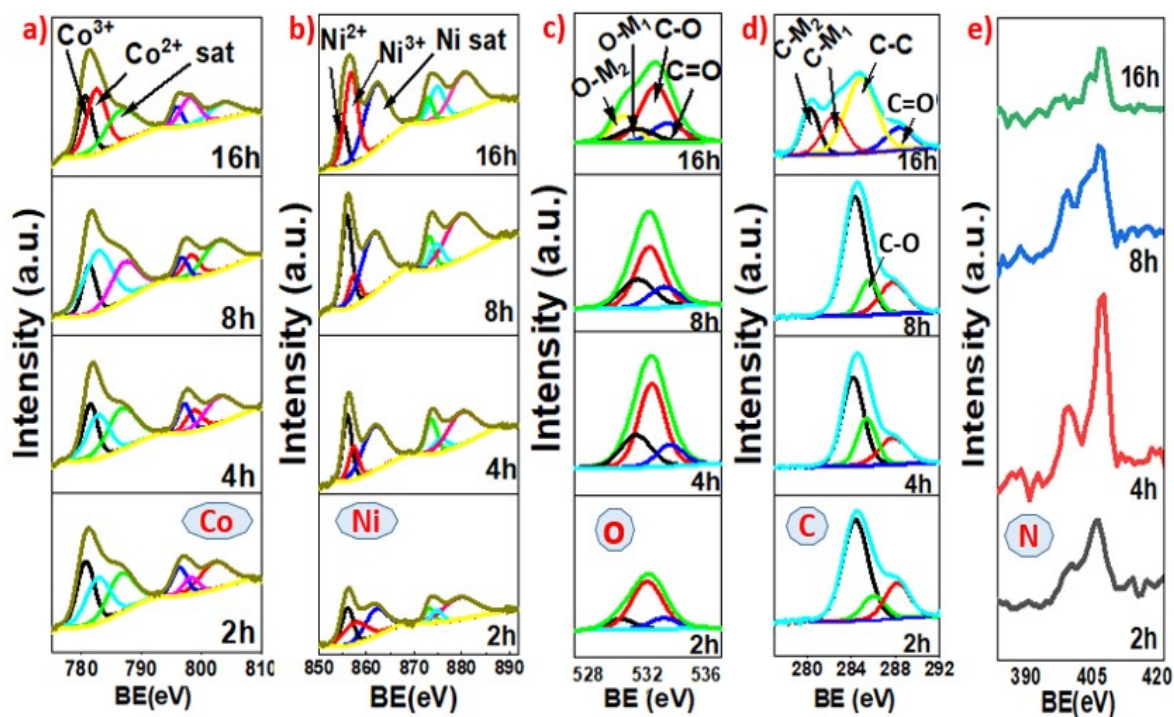

**Fig. S4:** High resolution XPS spectra of elements (a) Co, (b) Ni, (c) O, (d) C and (e) a zoom on N peak of the NiCoO@BC composites at different synthesis time durations (2h, 4h, 8h, 16h).

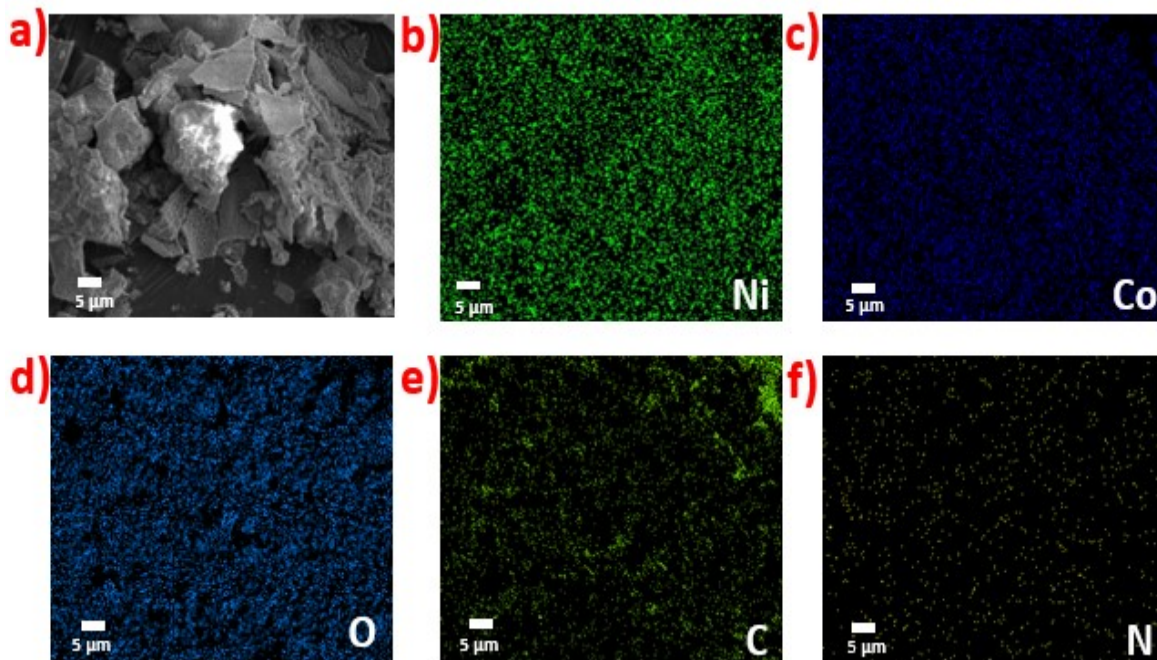

**Fig. S5:** (a) SEM and mapping images of the element distribution of (b) Ni, (c) Co, (d) O, (e) C and (f) N of the NiCoO@BC(4h) composite.

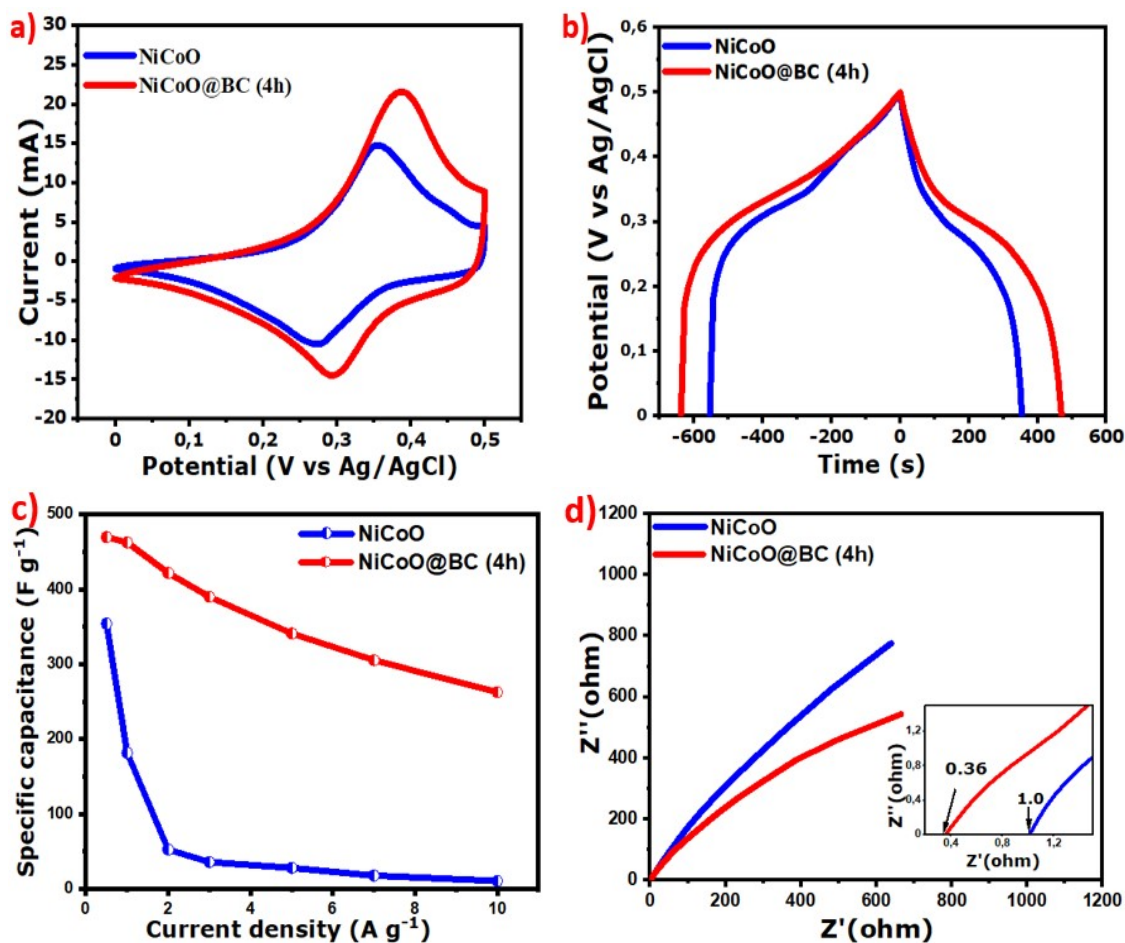

**Figure S6:** (a) CV curves at 5 mV s<sup>-1</sup>, (b) GCD profiles at current density of 0.5 A g<sup>-1</sup>, (c) specific capacitance versus current density and (d) EIS data for NiCoO@BC(4h) composite and pristine NiCoO.

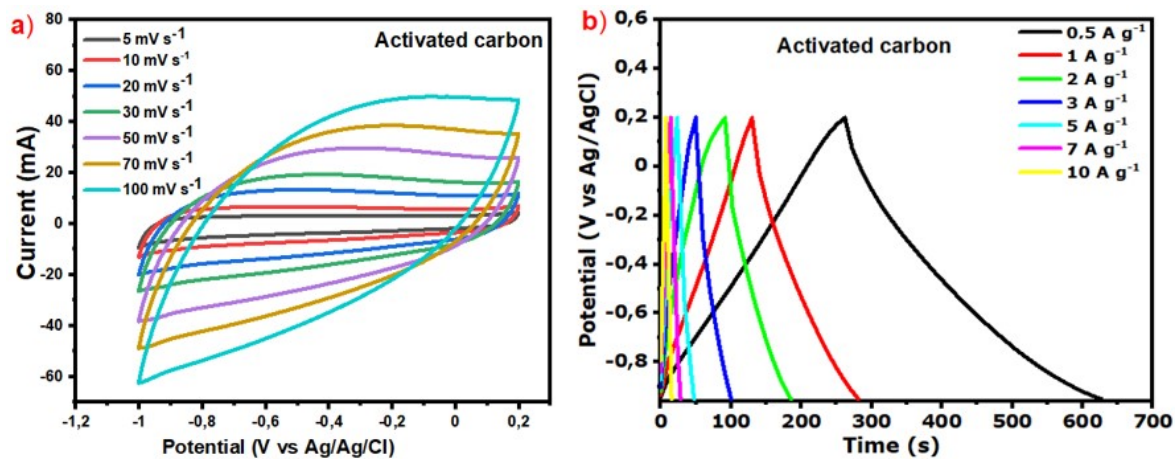

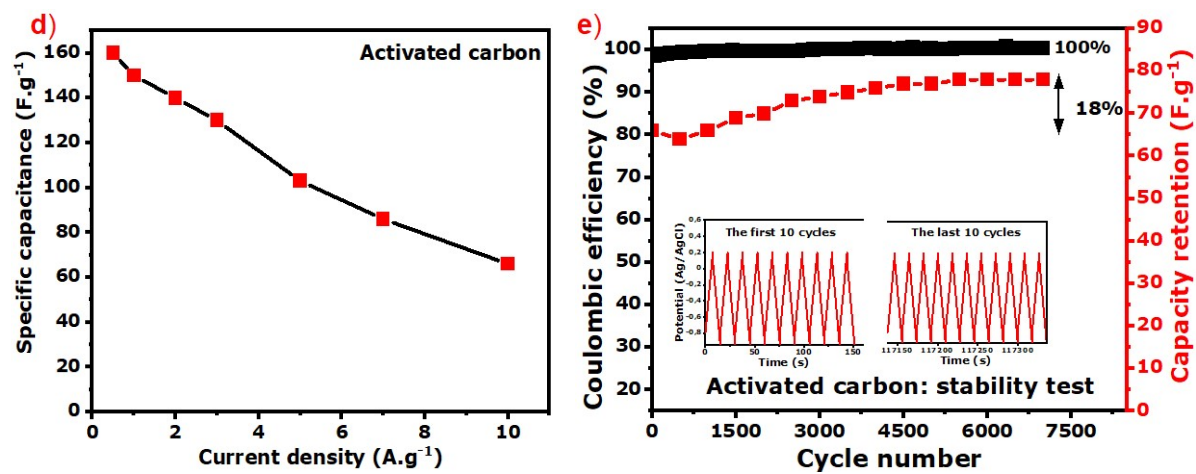

Figure S7: (a) CV, (b) GCD, (c) specific capacitance versus current density and (d) stability test of the Activated Carbon (AC).
